# Supplementary material for: Powering Research through Innovative Methods for Mixtures in Epidemiology (PRIME) Program: Novel and Expanded Statistical Methods
Source: MDPI journal article supplement (doi:10.3390/ijerph19031378), 2022-01-26
Supplement: s1 [file s1]

## Supplementary Material

**Table S1. PRIME Methods Details and Links to Software**

| Project <sup>1</sup> | Method<br>Acronym | Method<br>Title                                                                                                  | Use when...                                                                                                                                                                                                                                                                                                               | Software <sup>2</sup>                                                                                                                                                                                  |
|----------------------|-------------------|------------------------------------------------------------------------------------------------------------------|---------------------------------------------------------------------------------------------------------------------------------------------------------------------------------------------------------------------------------------------------------------------------------------------------------------------------|--------------------------------------------------------------------------------------------------------------------------------------------------------------------------------------------------------|
| BU/<br>Harvard       | BKMR-CMA          | Bayesian Kernel Machine Regression-Causal Mediation Analysis                                                     | Interest focuses on causal mediation analysis, and data exists on an environmental mixture, a continuous mediator, and a continuous outcome                                                                                                                                                                               | <a href="https://github.com/kdevick/BKMR-CMA">https://github.com/kdevick/BKMR-CMA</a>                                                                                                                  |
| BU/<br>Harvard       | BMIM              | Bayesian Multiple Index Model                                                                                    | Examining non-linear, non-additive relationships between exposures and outcome while reducing dimensionality via choice of indices                                                                                                                                                                                        | <a href="https://github.com/glenmcgee/BMIM">https://github.com/glenmcgee/BMIM</a>                                                                                                                      |
| BU/<br>Harvard       | DAG analysis      | Use of causal methods for determining which exposures to include in a model                                      | Modeling causal relationships between multiple exposures and a health outcome                                                                                                                                                                                                                                             | No specific software                                                                                                                                                                                   |
| Columbia             | BN2MF             | Bayesian Non-parametric non-negative Matrix Factorization                                                        | Same as PCP                                                                                                                                                                                                                                                                                                               | <a href="https://github.com/lizzyagibson/BN2MF">https://github.com/lizzyagibson/BN2MF</a>                                                                                                              |
| Columbia             | PCP               | Principal Component Pursuit                                                                                      | Aim is to identify exposure patterns in the population (either common sources or behaviors); preferably somewhat high-dimensional exposures for the process to be meaningful                                                                                                                                              | <a href="https://github.com/Columbia-PRIME/pcpr">https://github.com/Columbia-PRIME/pcpr</a><br><a href="https://github.com/Columbia-PRIME/PCPhelpers">https://github.com/Columbia-PRIME/PCPhelpers</a> |
| Duke                 | BAG               | Bag of DAGs                                                                                                      | Modeling spatiotemporal data that may be large and have non-stationary or direction dependence (e.g., due to the impact of winds on air pollution dispersal)                                                                                                                                                              | <a href="https://github.com/jinbora0720/BAG">https://github.com/jinbora0720/BAG</a>                                                                                                                    |
| Duke                 | BMC               | Bayesian Matrix Completion for hypothesis testing                                                                | 1) Large missingness in data having multiple chemicals and multiple assay endpoints, and/or 2) Want to predict activity of a new (chemical, assay endpoint) pair, and/or 3) Dose-response shapes are irregular, and/or 4) Heteroscedastic signals are evident                                                             | <a href="https://github.com/jinbora0720/BMC">https://github.com/jinbora0720/BMC</a>                                                                                                                    |
| Duke                 | BS3FA             | Bayesian partially supervised sparse and smooth factor analysis                                                  | 1) Data has functional Y and numeric (continuous, binary, count) data X,<br>2) No supervising X data are available and smooth unsupervised factor analysis is desired, 3) Want to compute distance of chemicals relevant to toxicity,<br>4) Want to predict activity for a new chemical without dose-response information | <a href="https://github.com/niehs-prime/bs3fa">https://github.com/niehs-prime/bs3fa</a>                                                                                                                |
| Duke                 | FIN               | Factor analysis for interactions                                                                                 | 1) Predictors are correlated and<br>2) Want to model pairwise/higher-order interactions of many predictors                                                                                                                                                                                                                | <a href="https://github.com/niehs-prime/factor_interactions">https://github.com/niehs-prime/factor_interactions</a>                                                                                    |
| Duke                 | GIF-SIS           | Generalized infinite factor model                                                                                | 1) Want to fit a member of the large class of factorization/factor models and<br>2) Variables have relationships which are known a priori and should inform shrinkage behavior                                                                                                                                            | <a href="https://github.com/lorenzo-schiavon/GIF_SIS">https://github.com/lorenzo-schiavon/GIF_SIS</a>                                                                                                  |
| Duke                 | GL-GPs            | Graph Laplacian based Gaussian Process                                                                           | Interested in performing nonparametric regression on a domain that is highly restricted or nonlinear                                                                                                                                                                                                                      | <a href="https://github.com/wunan3/Diffusion-based-Gaussian-Process">https://github.com/wunan3/Diffusion-based-Gaussian-Process</a>                                                                    |
| Duke                 | GriPS             | Computational improvements for Bayesian multivariate regression models based on latent meshed gaussian processes | Addressing how to efficiently solve the big-n problem for GPs when the number of outcomes is large                                                                                                                                                                                                                        | <a href="https://cran.r-project.org/package=meshed">https://cran.r-project.org/package=meshed</a>                                                                                                      |
| Duke                 | MatchAlign        | Resolving rotational ambiguity in matrix sampling                                                                | Interested in post-processing MCMC samples to allow inference on unidentifiable random matrices (e.g., factor loadings matrix)                                                                                                                                                                                            | <a href="https://github.com/poworoznek/infinitefactor">https://github.com/poworoznek/infinitefactor</a>                                                                                                |

| Project <sup>1</sup> | Method<br>Acronym   | Method<br>Title                                                                    | Use when...                                                                                                                                                                                                                                                                                       | Software <sup>2</sup>                                                                                                                                                                                                                                                                                                                                                        |
|----------------------|---------------------|------------------------------------------------------------------------------------|---------------------------------------------------------------------------------------------------------------------------------------------------------------------------------------------------------------------------------------------------------------------------------------------------|------------------------------------------------------------------------------------------------------------------------------------------------------------------------------------------------------------------------------------------------------------------------------------------------------------------------------------------------------------------------------|
| Duke                 | MixSelect           | Identifying main effects and interactions among exposures using Gaussian processes | 1) Want to decompose an outcome into linear effects, interactions, and non-linear effects of the predictors, and<br>2) Have hierarchical variable selection on main effects and interactions                                                                                                      | <a href="https://github.com/fedfer/MixSelect">https://github.com/fedfer/MixSelect</a>                                                                                                                                                                                                                                                                                        |
| Duke                 | MrGap               | Manifold Reconstruction via Gaussian Process                                       | 1) Want to obtain an estimate of a low-dimensional manifold in the original high-dimensional observation space and 2) Data are noisy                                                                                                                                                              | <a href="https://github.com/wunan3/Manifold-reconstruction-via-Gaussian-processes">https://github.com/wunan3/Manifold-reconstruction-via-Gaussian-processes</a>                                                                                                                                                                                                              |
| Duke                 | PFA                 | Perturbed factor analysis                                                          | A set of variables (e.g., chemical exposures) are expected to exhibit a similar covariance structure across multiple groups of observations (e.g., individuals from different demographic backgrounds) and the researcher would like to express that common structure via a set of shared factors | <a href="https://github.com/royarkaprava/Perturbed-factor-model">https://github.com/royarkaprava/Perturbed-factor-model</a>                                                                                                                                                                                                                                                  |
| Duke                 | SPAMTREE            | Spatial Multivariate Trees                                                         | Multiple gaussian outcomes, massive datasets (big n), some outcome measured at fewer input levels                                                                                                                                                                                                 | <a href="https://cran.r-project.org/package=spamtree">https://cran.r-project.org/package=spamtree</a>                                                                                                                                                                                                                                                                        |
| MSSM/<br>Harvard     | NLinteraction       | Bayesian semiparametric regression with sparsity inducing priors                   | Have data on a continuous outcome and an environmental mixture, and interest focuses on interaction among exposures within a mixture, and the form of the multivariate exposure-response surface is potentially complex                                                                           | <a href="https://github.com/jantonelli111/NLinteraction">https://github.com/jantonelli111/NLinteraction</a>                                                                                                                                                                                                                                                                  |
| MSSM/<br>Harvard     | ACR                 | Acceptable Concentration Range model                                               | Estimating points of departure from human data which may suggest data-driven uncertainty factors in risk assessments of single chemicals                                                                                                                                                          | NA                                                                                                                                                                                                                                                                                                                                                                           |
| MSSM/<br>Harvard     | Bayes Tree<br>Pairs | Bayesian Regression Tree Pairs                                                     | Interest focuses on identifying critical windows of exposure, when data on multiple exposures measures with high temporal resolution (e.g., weekly during pregnancy) is available<br>Relative to BKMR-DLM, is better for large datasets (e.g., large cohorts or administrative data)              | <a href="https://github.com/danielmork/dlmtree">https://github.com/danielmork/dlmtree</a>                                                                                                                                                                                                                                                                                    |
| MSSM/<br>Harvard     | BKMR-DLM            | Bayesian Kernel Machine Regression-Distributed Lag Model                           | Interest focuses on identifying critical windows of exposure, when data on multiple exposures measured with high temporal resolution (e.g., weekly during pregnancy) is available<br>Relative to Bayes Tree Pairs, is better for small to moderately sized datasets                               | <a href="https://github.com/niehs-prime/regimes">https://github.com/niehs-prime/regimes</a>                                                                                                                                                                                                                                                                                  |
| MSSM/<br>Harvard     | CVEK                | Cross-validated kernel ensemble                                                    | Interest focuses on sets of exposures, and how one set of exposures interacts with another set (e.g., Gene x Environment, Nutrition x Environment, Psychosocial Stress x Environment)                                                                                                             | <a href="https://github.com/IrisTeng/CVEK-1">https://github.com/IrisTeng/CVEK-1</a>                                                                                                                                                                                                                                                                                          |
| MSSM/<br>Harvard     | Het-DLM             | Heterogeneous distributed lag models                                               | Interest focuses on fitting distributed lag models to identify critical windows of a time-varying exposure, and on identifying subpopulations that are disproportionately affected (e.g., exhibit stronger distributed lag effects)                                                               | <a href="https://github.com/danielmork/dlmtree">https://github.com/danielmork/dlmtree</a>                                                                                                                                                                                                                                                                                    |
| MSSM/<br>Harvard     | LWQS                | Lagged Weighted Quantile Sum (WQS) regression                                      | Interest focuses on identifying critical windows of exposure and when the exposure temporal pattern differs across subjects                                                                                                                                                                       | <a href="https://mran.microsoft.com/snapshot/2020-02-28/web/packages/gWQS/vignettes/gwqs-vignette.pdf">https://mran.microsoft.com/snapshot/2020-02-28/web/packages/gWQS/vignettes/gwqs-vignette.pdf</a><br><a href="https://cran.r-project.org/web/packages/lwqs/vignettes/lwqs-vignette.html">https://cran.r-project.org/web/packages/lwqs/vignettes/lwqs-vignette.html</a> |
| MSSM/<br>Harvard     | Mult DLAG           | Multiple exposure distributed lag models with variable selection                   | Data includes measures of multiple exposures measured with high temporal resolution over a developmental window, and interest focusses on critical windows                                                                                                                                        | <a href="https://github.com/jantonelli111/BayesianDLAG">https://github.com/jantonelli111/BayesianDLAG</a>                                                                                                                                                                                                                                                                    |

| Project <sup>1</sup> | Method<br>Acronym | Method<br>Title                                                                                   | Use when...                                                                                                                                                                                                             | Software <sup>2</sup>                                                                                                                                             |
|----------------------|-------------------|---------------------------------------------------------------------------------------------------|-------------------------------------------------------------------------------------------------------------------------------------------------------------------------------------------------------------------------|-------------------------------------------------------------------------------------------------------------------------------------------------------------------|
|                      |                   |                                                                                                   | of exposure, and whether there are time-dependent interactions (does exposure of one pollutant early in time make an individual more susceptible to later exposures?)                                                   | <a href="https://github.com/evamtanner/Repeated_Holdout_WQS">https://github.com/evamtanner/Repeated_Holdout_WQS</a>                                               |
| MSSM/<br>Harvard     | RH-WQS            | Repeated holdout Weighted Quantile Sum (WQS) regression                                           | Interest includes generalization of results by addressing variability of weights and association parameters                                                                                                             | <a href="https://cran.r-project.org/web/packages/gWQS/vignettes/gwqs-vignette.html">https://cran.r-project.org/web/packages/gWQS/vignettes/gwqs-vignette.html</a> |
| MSSM/<br>Harvard     | SGP-MPI           | Scalable Gaussian Process regression via Median Posterior Inference                               | Interest lies in applying BKMR to massive data                                                                                                                                                                          | NA                                                                                                                                                                |
| MSSM/<br>Harvard     | DLMtree           | Bayesian Treed Distributed Lag Models                                                             | Interest focuses on identifying a non-linear effect of a single exposure and the critical window during which this exposure operates (e.g., specific weeks during pregnancy) on a health outcome measured in the future | <a href="https://github.com/danielmork/dlmtree">https://github.com/danielmork/dlmtree</a>                                                                         |
| ND/Rice              | BDS               | Bayesian Data Synthesis                                                                           | A dataset cannot be shared publicly, but analyses on it are published<br>The dataset may be comprised of mixed categorical, binary, count and continuous datatypes                                                      | <a href="https://github.com/drkowal">https://github.com/drkowal</a>                                                                                               |
| ND/Rice              | BSSVI             | Bayesian subset selection and variable importance for interpretable prediction and classification | The goal is to identify which variables jointly matter for prediction                                                                                                                                                   | <a href="https://github.com/drkowal/BayesSubsets">https://github.com/drkowal/BayesSubsets</a>                                                                     |
| ND/Rice              | BVSM              | Bayesian variable selection for understanding mixtures in environmental exposures                 | The goal is to select variables and provide uncertainty quantification for a linear model                                                                                                                               | <a href="https://github.com/drkowal/BayesSubsets">https://github.com/drkowal/BayesSubsets</a>                                                                     |
| ND/Rice              | FOTP              | Fast, optimal, and targeted predictions using parameterized decision analysis                     | The inferential target(s) can be represented as a functional of the data and the goal is either to predict the target(s) or interpret the model via the target(s)                                                       | <a href="https://github.com/drkowal">https://github.com/drkowal</a>                                                                                               |
| ND/Rice              | SCC               | Spatiotemporal case-crossover                                                                     | Information is available for spatial regions (e.g., census blocks) over time and when the constant exposure assumption is not reasonable and spatial regions are irregular                                              | <a href="https://github.com/kathysensor">https://github.com/kathysensor</a>                                                                                       |
| ND/Rice              | SiBAR             | State Informed Background Removal                                                                 | Interested in apportioning pollutants to local sources                                                                                                                                                                  | <a href="https://github.com/bactkinson/SiBaR_Background_Removal_and_Quantification">https://github.com/bactkinson/SiBaR_Background_Removal_and_Quantification</a> |
| UI Chicago           | MVNimpute         | Imputation of multivariate data by normal model                                                   | Preparing data for analysis                                                                                                                                                                                             | <a href="https://github.com/niehs-prime/mvnmimpute">https://github.com/niehs-prime/mvnmimpute</a>                                                                 |
| UI Chicago           | SPORM             | Semi-Parametric Odds Ratio Model                                                                  | Relationships among exposures, biologic intermediates and health outcomes are of major interest                                                                                                                         | <a href="https://github.com/hychen-uic/SPORM">https://github.com/hychen-uic/SPORM</a>                                                                             |
| UI Chicago           | TEV               | Estimation and inference on the explained variation parameter                                     | Exposures are high-dimensional, and the effects of the exposures are weak and dense                                                                                                                                     | <a href="https://github.com/hychen-uic">https://github.com/hychen-uic</a>                                                                                         |

<sup>1</sup> Listed in alphabetical order, by institution. Project details available at NIH RePORTER: <https://reporter.nih.gov/>. Institutions: Columbia University Mailman School of Public Health, University of Illinois Chicago, Icahn School of Medicine at Mount Sinai, Harvard T.H. Chan School of Public Health, University of Notre Dame, Rice University, Boston University School of Public Health, Duke University.

<sup>2</sup> Updates to the software and possible changes to the links provided are expected over time, including links to packages not yet available. To retrieve the most up to date software, query GitHub <https://github.com/> using the method title or acronym.
